# Management of Mendelian Traits in Breeding Programs by Gene Editing: A Simulation Study

John B. Cole<sup>1\*</sup>

<sup>1</sup>Animal Genomics and Improvement Laboratory, Agricultural Research Service, USDA, Beltsville, MD, USA

\*Corresponding author

Email addresses:

JBC: [John.Cole@ars.usda.gov](mailto:John.Cole@ars.usda.gov)

## 1 **Abstract**

## 2 **Background**

3 Genotypes based on high-density single nucleotide polymorphisms have recently been used to  
4 identify a number of novel recessive mutations that adversely affect fertility in dairy cattle as  
5 well as to track conditions such as polledness. The use of sequential mate allocation strategies  
6 that account for increases in genomic inbreeding and the economic impact of affected matings  
7 may result in faster allele frequency changes than strategies that do not consider inbreeding and  
8 monetary losses. However, the effect of gene editing on selection programs also should be  
9 considered because gene editing has the potential to dramatically change allele frequencies in  
10 livestock populations.

## 11 **Methods**

12 A simulation program developed to evaluate dairy cattle breeding schemes was extended to  
13 include the use of clustered regularly interspaced short palindromic repeat (CRISPR),  
14 transcription activator-like effector nuclease (TALEN), and zinc finger nuclease (ZFN)  
15 technologies for gene editing. A hypothetical technology with a perfect success rate was used to  
16 establish an upper limit on attainable progress, and a scenario with no editing served as a  
17 baseline for comparison.

## 18 **Results**

19 The technologies differed in the rate of success of gene editing as well as the success rate of  
20 embryo transfer based on literature estimates. The number of edited alleles was assumed to have  
21 no effect on success rate. The two scenarios evaluated considered only the horned locus or 12  
22 recessive alleles that currently are segregating in the U.S. Holstein population. The top 1, 5, or

23 10% of bulls were edited each generation, and either no cows or the top 1% of cows were edited.  
24 Inefficient editing technologies produced less cumulative genetic gain and lower inbreeding than  
25 efficient ones. Gene editing was very effective at reducing the frequency of the horned haplotype  
26 (increasing the frequency of polled animals in the population), and allele frequencies of the 12  
27 recessives segregating in the U.S. Holstein population decreased faster with editing than without.

## 28 **Conclusions**

29 Gene editing can be an effective tool for reducing the rate of harmful alleles in a dairy cattle  
30 population even if only a small proportion of elite animals are modified.

## 31 **Keywords**

32 allele frequency, gene editing, recessive disorders

## 33 **Background**

34 The widespread adoption and corresponding reduction in the cost of high-density single  
35 nucleotide polymorphism (SNP) genotyping has enabled the detection of many new recessives  
36 that have deleterious effects on fertility in several breeds of dairy cattle [1,2,3], and whole  
37 genome sequencing allows detecting additional fertility defects [4]. Many of these new  
38 recessives were not previously detected by test matings because they cause embryonic losses in  
39 early gestation that could not be distinguished from failed breedings. Annual losses to U.S. dairy  
40 farmers from decreased fertility and increased perinatal mortality due to known recessive defects  
41 are estimated to be at least \$10 million (€9,370,754) [3]. Mate allocation tools do not always  
42 consider carrier status when bull and cow pairs are assigned, and few make use of DNA marker  
43 or haplotype information. Avoiding carrier-to-carrier matings is easy when only a few recessives

44 are segregating in a population but is considerably more difficult when many defects are  
45 segregating.

46 Cole [5] recently extended a simple method for controlling the rate of increase in genomic  
47 inbreeding proposed by Pryce et al. [6] to account for economic losses attributable to recessive  
48 defects. In the original method, parent averages (PAs) for matings that produced inbred offspring  
49 were penalized, and the bull that produced the highest PA after the inbreeding adjustment was  
50 selected in a sequential manner. The number of matings permitted for each bull was constrained  
51 to prevent one bull with high genetic merit from being mated to all cows. Cole [5] modified this  
52 approach to include an additional term that penalized carrier-to-carrier matings that may produce  
53 affected embryos and showed that the additional penalty decreased minor allele frequency  
54 (MAF) faster than other methods. However, many generations of selection were still needed to  
55 eliminate recessives from the population, and some defects remained in the population at low  
56 frequency.

57 A number of tools are now available for editing eukaryotic genomes, including clustered  
58 regularly interspaced short palindromic repeats (CRISPR), transcription activator-like effector  
59 nucleases (TALEN), and zinc finger nucleases (ZFN) [7,8]. Treating simple recessive disorders  
60 by using gene editing is of great interest (e.g., [9]), and CRISPR has been used to generate pigs  
61 that are resistant to porcine reproductive and respiratory syndrome [10]. Gene editing also has  
62 been used to produce desirable phenotypes (e.g., polled cattle [11]). A recent series of simulation  
63 studies showed that gene editing also has the potential to improve rates of genetic gain for  
64 quantitative traits [12,13]. Gene editing may be an effective means of reducing the frequency of  
65 genetic disorders in livestock populations or eliminating those disorders altogether.

66 The objective of this research was to determine rates of allele frequency change and quantify  
67 differences in cumulative genetic gain through simulation for several genome editing  
68 technologies while considering varying numbers of recessives and different proportions of bulls  
69 and cows to be edited.

## 70 **Methods**

### 71 **Simulation**

72 The simulation software of Cole [14] was modified to include four different gene editing  
73 technologies and used to examine several scenarios for the use of gene editing in a dairy cattle  
74 population. With the exception of the gene editing methodology, the simulation procedures were  
75 identical to those described in detail by Cole [5]. Thirteen software parameters were used in the  
76 simulations (Table 1).

**Table 1 Simulation parameters**

| <b>Software parameter</b> | <b>Definition</b>                                                             | <b>Value</b>                          |
|---------------------------|-------------------------------------------------------------------------------|---------------------------------------|
| base_bulls                | Number of bulls in the base population                                        | 350                                   |
| base_cows                 | Number of cows in the base population                                         | 35,000                                |
| service_bulls             | Number of bulls in the sire portfolio used by each herd                       | 50                                    |
| base_herds                | Number of pseudo-herds used in the simulation                                 | 200                                   |
| max_bulls                 | Maximum number of bulls available for use as service sires in each generation | 500                                   |
| max_cows                  | Maximum number of cows in the population in each generation                   | 100,000                               |
| generations               | Number of generations simulated                                               | 20                                    |
| max_mating                | Maximum number of matings each service sire is permitted each year            | 5000                                  |
| debug                     | Show or hide debugging messages                                               | True                                  |
| history_freq              | Frequency with which history files are saved to disk                          | End                                   |
| rng_seed <sup>2</sup>     | Value used to seed the random number generator                                | Time + PID                            |
| edit_prop                 | Proportions of bulls and cows edited in different scenarios                   | 0%, 1%, 10% (bulls);<br>0%, 1% (cows) |
| edit_type <sup>3</sup>    | Technologies used for gene editing                                            | C, P, T, Z                            |

*Time* system clock time when the simulation is submitted, *PID* process identification reported by the operating system, *C* clustered regularly interspaced short palindromic repeats, *T* transcription activator-like effector nuclease, *P* hypothetical technology with perfect success rate, *Z* zinc finger nuclease

### 77 **Mate allocation**

78 The modified Pryce scheme accounting for recessive alleles described by Cole [5] was used to  
79 allocate bulls to cows in all scenarios. The selection criterion was the 2014 revision of the  
80 lifetime net merit (NM\$) genetic-economic index used in the United States [15]. For each herd,  
81 20% of the bulls were randomly selected from a list of live bulls, and the top 50 bulls from that  
82 group were selected for use as herd sires based on true breeding value (TBV). This produced  
83 different sire portfolios for each herd and is similar to the approach of Pryce et al. [6].

84 As in Cole [5], a matrix of PAs ( $\mathbf{B}'$ ) was constructed with rows corresponding to bulls and  
85 columns corresponding to cows as

$$86 \quad B'_{ij} = 0.5(TBV_i + TBV_j) - \lambda F_{ij} - \sum_{r=1}^{n_r} P(aa)_r \times v_r,$$

87 where  $B'_{ij}$  is the PA for offspring of bull  $i$  and cow  $j$ ,  $TBV_i$  is the TBV NM\$ for bull  $i$ ,  $TBV_j$  is  
88 the TBV NM\$ for cow  $j$ ,  $\lambda$  is the inbreeding depression in dollars associated with a 1% increase  
89 in inbreeding,  $F_{ij}$  is the pedigree coefficient of inbreeding of the calf resulting from mating bull  $i$   
90 to cow  $j$ ,  $n_r$  is the number of recessive alleles in a scenario,  $P(aa)_r$  is the probability of  
91 producing an affected calf for recessive locus  $r$ , and  $v_r$  is the economic value of locus  $r$ . The  
92 regression coefficient of NM\$ on inbreeding ( $\lambda$ ) was computed as the weighted average of the  
93 December 2014 effects of inbreeding on the traits in the index as done by Cole [5]; the weights  
94 correspond to those assigned to each trait in the NM\$ index and resulted in a  $\lambda$  of \$25. The  $P(aa)$   
95 equals 0.25 for a mating of two carriers, 0.5 for a mating of an affected animal with a carrier, or  
96 1 for a mating of two affected animals. Thirteen recessive loci were used in the simulations  
97 (Table 2).

**Table 2 Properties of the recessive loci included in each simulated scenario**

| Scenario           | N <sup>a</sup> | Frequency | Value (\$) <sup>b</sup> | Name           | Lethal |
|--------------------|----------------|-----------|-------------------------|----------------|--------|
| All recessive loci | 12             | 0.0276    | 150                     | Brachyspina    | Yes    |
|                    |                | 0.0192    | 40                      | HH1            | Yes    |
|                    |                | 0.0166    | 40                      | HH2            | Yes    |
|                    |                | 0.0295    | 40                      | HH3            | Yes    |
|                    |                | 0.0037    | 40                      | HH4            | Yes    |
|                    |                | 0.0222    | 40                      | HH5            | Yes    |
|                    |                | 0.0025    | 150                     | BLAD           | Yes    |
|                    |                | 0.0137    | 70                      | CVM            | Yes    |
|                    |                | 0.0001    | 40                      | DUMPS          | Yes    |
|                    |                | 0.0007    | 150                     | Mulefoot       | Yes    |
|                    |                | 0.9929    | 40                      | Horned         | No     |
|                    |                | 0.0542    | -20                     | Red coat color | No     |
| Horned locus       | 1              | 0.9929    | 40                      | Horned         | No     |

*HH1, HH2, HH3, HH4, HH5* Holstein fertility haplotypes 1,2,3,4,5, respectively, *BLAD* bovine leukocyte adhesion deficiency, *CVM* complex vertebral malformation, *DUMPS* deficiency of uridine monophosphate synthase

<sup>a</sup>Number of recessive loci in the scenario.

<sup>b</sup>Positive values are undesirable and negative values are desirable.

98 After  $\mathbf{B}'$  was constructed, a matrix of matings ( $\mathbf{M}$ ) was used to allocate bulls to cows. An  
 99 element ( $M_{ij}$ ) was set to 1 if the corresponding  $B'_{ij}$  value was the greatest value in column  $j$  (that  
 100 bull produces the largest PA of any bull available for mating to that cow); all the other elements  
 101 of that column were set to 0. If the sum of the elements of row  $i$  was less than the maximum  
 102 number of permitted matings for that bull, then the mating was allocated. Otherwise, the bull  
 103 with the next-highest  $B'_{ij}$  value in the column was selected. This procedure was repeated until  
 104 each column had only one element equal to 1.

## 105 Gene editing

106 In the simulation model, gene editing occurred when an embryo was created. The following six  
 107 steps were used and repeated for each locus to be edited:

108 Step 1: Sort candidates on TBV in descending order.

109 Step 2: Select animals to be edited based on the user-specified proportion.

110 Step 3: Edit *Aa* and *aa* genotypes to *AA* genotypes (all edited animals are assumed to be  
111 homozygous).

112 Step 4: Draw a uniform random variate and compare with the editing failure rate of the method  
113 to determine if the editing procedure was successful. This check was made to determine if the  
114 recessive (*a*) alleles were successfully changed to dominant (*A*) alleles in the embryo.

115 Step 5: Draw a uniform random variate and compare with the embryonic death rate of the  
116 method to determine if the embryo transfer (ET) procedure was successful. This check was made  
117 to determine if the edited embryo survived the ET procedure and resulted in a live calf.

118 Step 6: Update the animal record.

119 The overall success rate was the product of the editing success and embryonic death rates (Steps  
120 4 and 5). Figure 1 shows a flowchart describing the process in detail. The editing failure rate can  
121 be set to 0 to represent a scenario in which only embryos that were successfully edited are  
122 transferred to recipients. A scenario in which many embryos are produced so that survival of  
123 some is guaranteed can be simulated by setting the embryonic death rate to 0.

**Please place Fig. 1 around here**

124 Three laboratory approaches to gene editing (CRISPR, TALEN, and ZFN) were supported as  
125 well as a fourth method that assumes that editing always is successful. The CRISPR, TALEN,  
126 and ZFN methods differed in their editing success and embryonic death rates [7,8] (Table 3).  
127 Bulls and cows could be edited at different rates (e.g., 10% of bulls and 1% of cows). Any  
128 combination of loci could be edited, and the number of edited loci was not restricted. A scenario  
129 in which no genes were edited, which reflects current practice, was used as the baseline against



130 which the various editing scenarios were compared. A schematic of the simulated scenarios is in  
131 Figure 2.

132 **Table 3 Gene editing failure and embryonic death rates and trials needed for a live calf**

| Technolog<br>y | Editing failure<br>rate | Embryonic death<br>rate | Success<br>probability <sup>a</sup> | Trials (no.)       |               |           |
|----------------|-------------------------|-------------------------|-------------------------------------|--------------------|---------------|-----------|
|                |                         |                         |                                     | Successful<br>edit | Successful ET | Live calf |
| CRISPR         | 0.37                    | 0.79                    | 0.71                                | 5                  | 20            | 100       |
| TALEN          | 0.79                    | 0.88                    | 0.30                                | 20                 | 37            | 740       |
| Perfect        | 0.00                    | 0.00                    | 1.00                                | 1                  | 1             | 1         |
| ZFN            | 0.89                    | 0.92                    | 0.18                                | 40                 | 56            | 2240      |

*CRISPR* clustered regularly interspaced short palindromic repeats, *TALEN* transcription activator-like effector nuclease, *Perfect* hypothetical technology with a perfect success rate, *ZFN* zinc finger nuclease, *ET* embryo transfer.

<sup>a</sup>Calculated as  $1 - (\text{editing failure rate} \times \text{embryonic death rate})$ .

**Please place Fig. 2 around here**

### 133 **Analysis**

#### 134 *Trials required*

135 The number of trials required to produce a live, gene-edited calf was determined for each of the  
136 four editing technologies (Table 3) by computing the number of draws needed from a geometric  
137 distribution to have a 99% probability of obtaining a success using the editing failure and  
138 embryonic death rates as the probability of success. The total number of trials was the product of  
139 the number of trials required for a successful edit and the number of trials needed for a  
140 successful ET. Producing a calf of the desired sex was assumed to be possible through the use of  
141 sexed semen, selection among the embryos in a flush, or other assisted reproductive technology.

#### 142 *Expected allele frequencies*

143 The results for each scenario were averaged over 10 replicates. Observed changes in allele  
144 frequency were compared against expectations, and expected allele frequencies in each  
145 generation for lethal defects were calculated as in [16]:

146 
$$p_t = \frac{p_{t-1}^2 + p_{t-1}(q_{t-1})}{2p_{t-1}^2 + p_{t-1}(q_{t-1})},$$

147 
$$q_t = \frac{p_{t-1}(q_{t-1})}{2p_{t-1}^2 + p_{t-1}(q_{t-1})},$$

148 where  $p_t$  is the frequency of the major allele at time  $t$ ,  $q_t$  is the MAF at time  $t$ , and  $t$  ranges from 1  
149 to 20 years. The MAF at time 0 was used in each scenario for each recessive locus (Table 2), and  
150 the major allele frequency was calculated as  $1 - \text{MAF}$ . Expected frequencies for non-lethal  
151 alleles were calculated using Hardy–Weinberg proportions [17]:

152 
$$p_t = p_{t-1}^2 + p_{t-1}(q_{t-1}),$$

153 
$$q_t = q_{t-1}^2 + p_{t-1}(q_{t-1}).$$

154 ***Rate of allele frequency change***

155 For each recessive locus in each scenario, observed allele frequencies were regressed on birth  
156 year using the Python module Statsmodels version 0.6.1 ([18,19]) using the model:

157 
$$y_t = b_0 + b_1g_t + b_2g_t^2 + e_t,$$

158 where  $y_t$  is the frequency of a recessive locus at time  $t$ ,  $b_0$  is the intercept,  $b_1$  is the regression  
159 coefficient associated with the linear effect of time,  $g_t$  is the generation number at time  $t$ ,  $b_2$  is the  
160 regression coefficient associated with the quadratic effect of time,  $g_t^2$  is the square of the  
161 generation number at time  $t$ , and  $e_t$  is the random residual error.

## 162 *Visualization*

163 Plots of actual versus expected allele frequencies and the change in carrier proportions over time  
164 were constructed using matplotlib version 1.5.1 [20,21]. Changes in observed allele frequencies  
165 over time were plotted using Seaborn version 0.5.1 [22].

## 166 **Results and discussion**

### 167 **Scenarios**

168 Two scenarios are discussed: 1% of bulls and 0% of cows edited, and 10% of bulls and 1% of  
169 cows edited. These scenarios represented the two extremes (least versus most editing), and the  
170 results from the other scenarios were intermediate to these results. When selection is based on  
171 TBV and not carrier status, more efficient editing procedures generally produce greater  
172 responses. Recent research has shown that biopsies of bovine embryos, such as might be used for  
173 genotyping, do not affect pregnancy rate [23]; therefore, success rates might be improved  
174 through more rigorous ET protocols for edited embryos even when editing technologies differ.  
175 Although the cost of producing gene-edited animals decreases as the technology becomes more  
176 efficient, this study did not examine those differences because no data on actual costs of  
177 production were publicly available.

### 178 **Trials required for successful procedures**

179 The numbers of trials required to ensure a 99% chance of successfully editing embryos (Step 4)  
180 and of getting a live calf on the ground following ET (Step 5) are in Table 3. Of the existing  
181 technologies, CRISPR was the most efficient by a factor of ~7, requiring only 100 trials to  
182 produce a live calf. ZFN was only a quarter as efficient, requiring 2240 trials to produce a live  
183 calf. Although determining the actual cost of producing a gene-edited calf is difficult, \$10,000

184 per animal seems reasonable [24]. Production costs would then range from \$1 million (CRISPR)  
185 to \$22.4 million (ZFN). Such high costs would almost certainly make gene editing commercially  
186 non-viable in the scenarios considered in this study, but an increase in ET success rate to 50%  
187 [25] would reduce costs by a factor of 3 to 8. The cost of producing a live calf using CRISPR  
188 would then be only \$350,000, which could easily be recovered from semen sales. If sexed semen  
189 is not used to ensure that a calf of the desired gender is born, then the totals should be doubled.  
190 For this analysis, only a single recessive was assumed to be edited, and more trials will be  
191 required if many loci are edited in the same embryo.

192 An additional assumption was that only one embryo was edited per mating (only a single trial  
193 was carried out). However, in practice, many embryos would be edited and transferred to ensure  
194 the live birth of a calf of the desired sex. As discussed, such cases may be simulated by setting  
195 the editing failure rate and the embryonic death rate to 0. Therefore, the results of this study are  
196 underestimates of allele frequency changes that might be observed in commercial production.

## 197 **Allele frequency changes**

### 198 *Recessive loci*

199 Only results for HH3 from the simulations that included all 12 Holstein recessives and for  
200 horned are discussed. The other loci in the 12-recessive simulation had results similar to those  
201 for HH3 (for lethals) and horned (the polled locus). These trends are broadly similar to the  
202 results of Segelke et al. [26], who showed that MAFs decrease much faster when dams are  
203 selected using an index based on six loci (HH1, HH2, HH3, HH4, HH5, and polled) rather than  
204 on breeding values for fertility.

205 ***HH3***

206 The causal variant associated with HH3 is a non-synonymous mutation in the *SMC2* (*structural*  
207 *maintenance of chromosomes 2*) gene at 95,410,507 bp on bovine chromosome (BTA for *Bos*  
208 *taurus*) BTA8 [27] and currently has the highest allele frequency of any known deleterious  
209 recessive in U.S. Holsteins (0.0295). As technology efficiency increased, the rate of allele  
210 frequency change also increased (Table 4). The most efficient technologies (CRISPR and  
211 Perfect) had the fastest rates of change (Fig. 3) and also were the only cases in which observed  
212 trends exceeded expected trends (Fig. 4). Differences between methods were much greater than  
213 differences between proportions of animals edited. This may be due, in part, to the failure model  
214 used in the simulation: when an edit is unsuccessful, the animal's genotype at the edited locus is  
215 not changed. Inefficient technologies will often fail to change heterozygous (*Aa*) genotypes to  
216 homozygous dominant (*AA*) genotypes, which reduces the rate at which allele frequencies  
217 change. The addition of females did not have a notable effect on rates of allele frequency change.  
218 This may be due to the absence from the simulation of advanced reproductive technologies used  
219 to propagate elite genotypes (e.g., in vitro fertilization combined with ET for elite cow families  
220 to produce flushes of embryos with high PAs).

**Table 4 Coefficients for regression of observed allele frequency on birth year and standard errors**

| Recessive | Technology | 1% bulls and 0% cows gene edited <sup>a,b</sup> |                      |                        |                         | 10% bulls and 1% cows edited <sup>a,b</sup> |                      |                        |                         |
|-----------|------------|-------------------------------------------------|----------------------|------------------------|-------------------------|---------------------------------------------|----------------------|------------------------|-------------------------|
|           |            | $b_{\text{linear}}$                             | $SE_{\text{linear}}$ | $b_{\text{quadratic}}$ | $SE_{\text{quadratic}}$ | $b_{\text{linear}}$                         | $SE_{\text{linear}}$ | $b_{\text{quadratic}}$ | $SE_{\text{quadratic}}$ |
| HH3       | No edits   | -0.0007**                                       | 0.000                | <b>-2.28E-05</b>       | <b>1.06E-05</b>         | <b>0.0003</b>                               | <b>0.000</b>         | -5.93E-05**            | 8.64E-06                |
|           | ZFN        | -0.0014**                                       | 0.000                | <b>1.059E-05</b>       | <b>1.3E-05</b>          | <b>0.0002</b>                               | <b>0.000</b>         | -4.86E-05**            | 1.12E-05                |
|           | TALEN      | -0.0026**                                       | 0.000                | 8.43E-05**             | 8.26E-06                | -0.0012**                                   | 0.000                | <b>2.677E-05</b>       | <b>1.07E-05</b>         |
|           | CRISPR     | -0.0048**                                       | 0.000                | 0.0001**               | 7.67E-06                | -0.0031**                                   | 0.000                | 5.001E-05*             | 1.54E-05                |
|           | Perfect    | -0.0050**                                       | 0.000                | 0.0002**               | 1.13E-05                | -0.0050**                                   | 0.000                | 0.0002**               | 8.75E-06                |
| Horned    | No edits   | -0.0006**                                       | 0.000                | <b>1.677E-05</b>       | <b>6.34E-06</b>         | -0.0017**                                   | 0.000                | 0.0001**               | 1.89E-05                |
|           | ZFN        | -0.0109**                                       | 0.001                | <b>-0.0002</b>         | <b>3.66E-05</b>         | -0.0123**                                   | 0.001                | -0.0004**              | 6.65E-05                |
|           | TALEN      | -0.0303**                                       | 0.003                | <b>-3.098E-05</b>      | <b>0.000</b>            | -0.0338**                                   | 0.003                | <b>0.0001</b>          | <b>0.000</b>            |
|           | CRISPR     | -0.0986**                                       | 0.005                | 0.0022**               | 0.000                   | -0.1070**                                   | 0.006                | 0.0025**               | 0.000                   |
|           | Perfect    | -0.1428**                                       | 0.006                | 0.0044**               | 0.000                   | -0.1418**                                   | 0.006                | 0.0044**               | 0.000                   |

Regression was for five different editing technologies over 20 years in scenarios where either the top 1% of bulls and 0% cows were edited or the top 10% of bulls and top 1% of cows were edited. *CRISPR* clustered regularly interspaced short palindromic repeats, *TALEN* transcription activator-like effector nuclease, *Perfect* hypothetical technology with a perfect success rate, *ZFN* zinc finger nuclease;  $b$  regression coefficient; SE standard error  
<sup>a</sup> $t$  test significance for the hypotheses that  $|b_{\text{linear}}| = 0$  and  $|b_{\text{quadratic}}| = 0$ : \* $P < 0.01$ , \*\* $P < 0.001$ ; bold terms did not differ from 0.

<sup>b</sup>The software used for analysis displays only three digits, SE < 0.001 were truncated to 0.000, but actual values were not exactly 0.

**Please place Fig. 3 around here**

**Please place Fig. 4 around here**

221 Rates of inbreeding did not differ between editing methods when only bulls and no cows were  
 222 edited (Fig. 5a). However, rates of inbreeding did differ when both bulls and cows were edited  
 223 (Fig. 5b) for CRISPR, TALEN, and ZFN. When the ET process fails, the embryo dies (Fig. 1),  
 224 which results in the loss of a calf with high-genetic-merit in the next generation because only  
 225 elite embryos are edited. If the process is inefficient and many embryos die, then animals are  
 226 used as sires that would otherwise not be selected. The reduction in inbreeding is greatest for the  
 227 least efficient method (ZFN), followed in order by TALEN and CRISPR. Editing methods with  
 228 high failure rates result in the selection of parents that would not otherwise have been selected,  
 229 which reduces within-family matings and inbreeding rates.

**Please place Fig. 5 around here**

230 *Horned*

231 The polled (hornless) state is dominant to the horned state. This discussion is focused on horned,  
232 the recessive allele, to mirror the results and discussion for HH3 as well as findings of Cole [5].  
233 Previous studies on breeding strategies for decreasing the frequency of the recessive (horned)  
234 allele in dairy cattle (e.g., [5,28,29]) suggested that rates of change would be very slow, and a  
235 number of authors have instead proposed selection directly on the polled locus or linked markers  
236 (e.g., [30,31,32,33,34]). Long-term progress can be improved slightly by putting more weight on  
237 favorable minor alleles in selection programs [35], but progress would be much faster using gene  
238 edits for the favorable allele.

239 In this simulation, a single locus was assumed to control polledness, but in reality the polled  
240 locus is more complex than HH3 and has at least two mutations on BTA1 that result in hornless  
241 cattle [36,37]. All gene-editing methods resulted in significant rates of allele frequency change  
242 (Table 4), with rates of change increasing with the efficiency of the technology (Fig. 6).

243 Regression coefficients were similar regardless of the proportion of bulls and cows edited. In  
244 contrast to the results obtained for HH3, observed trends were greater than expected trends for  
245 every editing technology (Fig. 7). Differences between methods were much greater than  
246 differences between proportions of animals edited. Even the least-efficient editing technology  
247 produced large reductions in the frequency of horned cattle, which is a notable improvement  
248 over the results of Cole [5], who found no allele frequency change after including the economic  
249 value of polledness in the selection criterion. Differences in rates of inbreeding for the horned  
250 locus (not shown) were similar to those observed for HH3, again supporting that higher failure  
251 rates will result in sampling more diverse pedigrees than would otherwise be the case.

**Please place Fig. 6 around here**

**Please place Fig. 7 around here**

252 *Cumulative genetic gain*

253 Two sets of *t* tests were conducted to evaluate cumulative genetic gain over the 30 years (10  
254 rounds of burn-in and 20 rounds of selection) of the simulation. First, a *t* test was used to  
255 compare each gene editing technology within a scenario against no gene editing to determine if  
256 different technologies produce different rates of gain. Then a set of *t* tests was used to compare  
257 gene editing technologies across scenarios to determine if the proportion of animals edited had  
258 an effect on cumulative gain. Results differed slightly between the horned-only and 12-recessive  
259 scenarios; however, the pattern of responses was the same, and only results for the 12-recessive  
260 scenario are discussed.

261 The pattern for cumulative genetic gain was similar to that for rates of inbreeding. The Perfect  
262 technology did not differ from no gene editing for either 1% bulls and no cows edited or 10% of  
263 bulls and 1% of cows edited. However, CRISPR, TALEN, and ZFN all showed significantly  
264 lower cumulative genetic gains ( $P < 0.01$ ), with larger differences for less efficient technologies.  
265 Similarly, the scenarios with higher rates of editing also had no differences for no gene editing  
266 and the Perfect technology as well as significantly lower rates of gain for CRISPR, TALEN, and  
267 ZFN ( $P < 0.01$ ). As previously discussed, when many embryos die during ET, fewer elite  
268 animals are available to become parents in the next generation. This resulted in lower rates of  
269 genetic gain that were proportional to the ET failure rate over the course of the simulation.

270 *Scenario comparison*

271 For both editing scenarios (1% of bulls and 0% of cows edited, and 10% of bulls and 1% of cows



272 edited), the use of gene editing resulted in faster allele frequency changes; more efficient  
273 technologies produced faster rates of change. A comparison of results for the horned locus from  
274 the horned-only and 12-recessive scenarios (not shown) indicates that the number of loci edited  
275 in a scenario had no effect on the rates of allele frequency change. This is expected because gene  
276 edits are modelled as independent events, and few animals are carriers of more than one  
277 recessive.

### 278 **Embryonic losses**

279 The proportion of embryos that died in each birth year because they were homozygous for lethal  
280 conditions (Fig 8) also decreased rapidly when only 1% of bulls and no cows were edited using  
281 CRISPR and TALEN. When the editing procedure is highly efficient, fewer affected embryos  
282 are produced, even when the number of edited parents is few. The Perfect technology produced  
283 rapid decreases in both scenarios as expected.

### **Please place Fig. 8 around here**

284 These results contrast with those of Cole [5], who reported that the number of embryos that died  
285 from recessive disorders was higher for scenarios with constrained inbreeding and penalized  
286 carrier parents. Cole concluded that the goal of eliminating recessive alleles from the population  
287 (fixing haplotypes in a homozygous state) conflicted with the goal of minimizing inbreeding  
288 (avoidance of increases in homozygosity). However, if loci can be edited, then favourable alleles  
289 can be introduced without affecting overall inbreeding in the population because the number of  
290 known recessives is low compared to the size of the genome. These results also may reflect the  
291 parameters used in the simulation. With a cow population of 100,000 and 5000 matings  
292 permitted per year per bull, a cohort of only 20 bulls could breed every cow in the population. If

293 the top 10% of bulls ( $n = 50$ ) were edited, all cows could have been bred to gene-edited bulls and  
294 no affected embryos produced.

### 295 **Avoidance of carrier bulls**

296 The proportion of bulls edited had only small effects on allele frequency changes, and the  
297 proportion of cows edited had essentially no effect on allele frequency changes, possibly because  
298 of the small proportion of cows edited. However, assuming higher editing rates is unrealistic  
299 given current limitations of the technology. In the future, artificial-insemination firms may  
300 simply refuse to purchase embryos or calves that are carriers of known genetic defects and forgo  
301 very little (or no) genetic gain to eliminate recessives from the population rapidly. Cole et al. [3]  
302 showed that genetic merit for NM\$ of Ayrshire and Jersey bulls that carry at least one known  
303 recessive disorder does not differ from those free of known recessives and that Brown Swiss ( $P =$   
304  $0.087$ ) and Holstein ( $P < 0.001$ ) carriers have lower average predicted transmitting abilities than  
305 non-carriers. The proportion of genotyped Holstein bulls and cows born since 2000 that are  
306 carriers of at least one known recessive was fairly constant between 2000 and 2010 but began to  
307 decrease more quickly in 2011 (Fig. 9), which is when haplotype tests were introduced for several  
308 new genetic disorders [1]. Collectively, these results suggest that artificial-insemination firms  
309 already avoid carrier bulls when purchasing embryos and young bulls. This approach is probably  
310 the fastest and least expensive for eliminating harmful genetic defects from the population, but it  
311 will not increase the frequency of desirable attributes (e.g., polledness).

**Please place Fig. 9 around here**

### 312 **Regulatory considerations**

313 Although some gene-edited products recently have reached the U.S. marketplace [38,39],  
314 regulatory uncertainty remains a concern [40]. This was underscored by much of the discussion  
315 at the 2016 Large Animal Genetic Engineering Summit [41], which focused largely on the use of  
316 gene editing and other tools to produce large animal models of human disease (e.g., [42]) rather  
317 than food animals because of the concerns surrounding consumer acceptance of gene-edited  
318 animals in the food chain. Policymakers and regulators are being encouraged to exercise  
319 oversight based on the product rather than the tool used to generate that product [43], but if (or  
320 when) meat and milk from gene-edited animals will be offered for sale is not clear at present.

### 321 **Acceptance of gene editing**

322 Consumers and regulators may be more willing to support the use of gene editing for improving  
323 animal welfare rather than simply for increasing productivity. For example, the process of  
324 dehorning is traumatic to calves, unpleasant for farmers, and distasteful to consumers (e.g., [44]).  
325 Previous studies [5,29] have shown that increasing the frequency of polled animals in the  
326 Holstein population is difficult because the frequency of the dominant allele is very low  
327 (0.0061). Carlson et al. [11] have successfully produced polled clones of horned animals using  
328 gene editing with no detectable off-target effects, which shows that the technology could be used  
329 to propagate desirable polled genotypes rapidly. Gene editing also has been used to produce  
330 animals with increased resistance to disease [45], including porcine reproductive and respiratory  
331 syndrome [10,46] and bovine tuberculosis [47]. Other candidates for gene editing include casein  
332 variants that may have beneficial effects on human health [48], the *slick* locus that is involved in  
333 adaptation to hot environments thermotolerance [49], and the *DGAT1* gene which has favourable  
334 effects on milk composition [50].

335 Many challenges are associated with genetically modified organisms, some technical and others  
336 related to consumer attitudes towards the technology [51,52]. Although the technology has  
337 improved dramatically in recent years, the general public remains concerned about genetically  
338 modifying food crops and livestock. A recent meta-analysis of the literature on consumer  
339 preferences suggests that U.S. respondents have a more favourable view of biotechnologically  
340 modified food products than those from Europe, but that most consumers are concerned about  
341 genetically modified animals [53]. Consumers that are generally opposed to the marketing of  
342 genetically modified organisms may moderate those opinions in the presence of another benefit  
343 (e.g., increased levels of omega-3 fatty acids in farmed salmon) [54]. Changing consumer  
344 attitudes towards technologies may be possible, but the arguments need to focus on the benefits  
345 rather than the technology [55]. Consumers may be more accepting of gene editing in food  
346 animals if the technology focus is on animal health and welfare rather than productivity.

## 347 **Conclusions**

348 The efficiency of gene editing technologies has a greater effect on allele frequency change than  
349 the proportion of animals in the population edited. Gene editing is a useful tool for increasing the  
350 frequency of desirable characteristics that are at low frequency in current populations (e.g.,  
351 polledness). Removing carriers of harmful recessives from the population may be more effective  
352 than correcting them with gene editing. The use of gene editing to increase the frequency of  
353 alleles that confer resistance to disease may be more acceptable to consumers than using the  
354 technology to increase genetic merit for quantitative traits. Applications of gene editing in  
355 livestock should focus on loci with large, beneficial impacts on animal health rather than on  
356 recessive defects with low allele frequencies in the population, because the latter can better be  
357 managed through mating programs.

358 **Declarations**

359 **Ethics approval and consent to participate**

360 This study involved no animal experimentation and did not require any authorization from local  
361 ethics committee.

362 **Consent for publication**

363 Not applicable.

364 **Availability of data and material**

365 The source code for the simulation and the Jupyter [56] notebooks used to analyze the data are  
366 available on GitHub [14] under a Creative Commons CC0 1.0 Universal (public domain)  
367 license.

368 **Competing interests**

369 The author declares that he has no competing interests. Mention of trade names or commercial  
370 products in this article is solely for the purpose of providing specific information and does not  
371 imply USDA recommendation or endorsement. USDA is an equal opportunity provider and  
372 employer.

373 **Funding**

374 JBC was supported by appropriated project 8042-31000-101-00 (Improving Genetic Predictions  
375 in Dairy Animals Using Phenotypic and Genomic Information) of the Agricultural Research  
376 Service, USDA.

377 **Authors' contributions**

378 Not applicable.

379 **Acknowledgements**

380 Suzanne Hubbard and Daniel Null (Animal Genomics and Improvement Laboratory,  
381 Agricultural Research Service, USDA, Beltsville, MD) assisted with figures and technical  
382 editing, and Kristen Parker Gaddis (Council on Dairy Cattle Breeding, Bowie, MD) and Paul  
383 VanRaden (Animal Genomics and Improvement Laboratory, Agricultural Research Service,  
384 USDA, Beltsville, MD) provided several insightful comments about the manuscript.

385 **References**

- 386 1. VanRaden PM, Olson KM, Null DJ, Hutchison JL. Harmful recessive effects on fertility  
387 detected by absence of homozygous haplotypes. *J Dairy Sci.* 2011;94:6153–61.
- 388 2. Cole JB, VanRaden PM, Null DJ, Hutchison JL, Cooper TA, Hubbard SM. AIP Research  
389 Report GENOMIC3 (09-13): Haplotype tests for recessive disorders that affect fertility and other  
390 traits. In: Animal Improvement Program. Animal Genomics and Improvement Laboratory, ARS,  
391 USDA. 2016. [https://aipl.arsusda.gov/reference/recessive\\_haplotypes\\_ARR-G3.html](https://aipl.arsusda.gov/reference/recessive_haplotypes_ARR-G3.html). Accessed  
392 23 Feb 2017.
- 393 3. Cole JB, Null DJ, VanRaden PM. Phenotypic and genetic effects of recessive haplotypes on  
394 yield, longevity, and fertility. *J Dairy Sci.* 2016;99:7274–88.
- 395 4. Charlier C, Li W, Harland C, Littlejohn M, Coppieters W, Creagh F, et al. NGS-based  
396 reverse genetic screen for common embryonic lethal mutations compromising fertility in  
397 livestock. *Genome Res.* 2016;26:1–9.
- 398 5. Cole JB. A simple strategy for managing many recessive disorders in a dairy cattle breeding

- 399 program. *Genet Sel Evol.* 2015;47:947.
- 400 6. Pryce JE, Hayes BJ, Goddard ME. 2012. Novel strategies to minimize progeny inbreeding  
401 while maximizing genetic gain using genomic information. *J. Dairy Sci.* 2012;95:377–88.
- 402 7. Lillico SG, Proudfoot C, Carlson DF, Stverakova D, Neil C, Blain C, et al. Live pigs  
403 produced from genome edited zygotes. *Sci Rep.* 2013;3:2847.
- 404 8. Hai T, Teng F, Guo R, Li W, Zhou Q. One-step generation of knockout pigs by zygote  
405 injection of CRISPR/Cas system. *Cell Res.* 2014;24:372–5.
- 406 9. Maeder ML, Gersbach CA. Genome-editing technologies for gene and cell therapy. *Mol*  
407 *Ther.* 2016;24:430–46.
- 408 10. Whitworth KM, Rowland RRR, Ewen CL, Tribble BR, Kerrigan MA, Cino-Ozuna AG, et al.  
409 Gene-edited pigs are protected from porcine reproductive and respiratory syndrome virus. *Nat*  
410 *Biotechnol.* 2016;34:20–2.
- 411 11. Carlson DF, Lancto CA, Zang B, Kim E-S, Walton M, Oldeschulte D, et al. Production of  
412 hornless dairy cattle from genome-edited cell lines. *Nat Biotechnol.* 2016;34:479–81.
- 413 12. Jenko J, Gorjanc G, Cleveland MA, Varshney RK, Whitelaw C, Woolliams JA, et al.  
414 Potential of promotion of alleles by genome editing to improve quantitative traits in livestock  
415 breeding programs. *Genet Sel Evol.* 2016;47:55.
- 416 13. Hickey JM, Bruce C, Whitelaw A, Gorjanc G. Promotion of alleles by genome editing in  
417 livestock breeding programmes. *J Anim Breed Genet.* 2016;133:83–4.
- 418 14. Cole JB. Python programs and notebooks used for simulation of gene editing in dairy cattle  
419 breeding programs. <https://github.com/wintermind/gene-editing/>. Accessed 13 Mar 2017.
- 420 15. VanRaden PM, Cole JB. AIP Research Report NM\$5 (10-14): Net merit as a measure of  
421 lifetime profit: 2014 revision. In: Animal Improvement Program. Animal Genomics and

- 422 Improvement Laboratory, ARS, USDA. 2014. <https://aipl.arsusda.gov/reference/nmcalc->  
423 2014.htm. Accessed 23 Feb 2017.
- 424 16. Van Doormaal BJ, Kistemaker GJ. 2008. Managing genetic recessives in Canadian  
425 Holsteins. *Interbull Bull.* 2008;38:75–9.
- 426 17. Falconer DS, MacKay TFC. *Introduction to quantitative genetics.* London: Longman; 1996.
- 427 18. Seabold JS, Perktold J. *Statsmodels. Econometric and statistical modeling with Python.* In  
428 *Proceedings of the 9th Python in Science Conference: 28 June–3 July 2010; Austin, TX.*  
429 <http://conference.scipy.org/proceedings/scipy2010/pdfs/seabold.pdf>. Accessed 7 Mar 2017.
- 430 19. *Statsmodels.* <http://statsmodels.sourceforge.net/>. Accessed 8 Mar 2017.
- 431 20. Hunter JD. *Matplotlib: a 2D graphics environment.* *Comput Sci Eng.* 2007;9:90–5.
- 432 21. *Matplotlib.* <http://matplotlib.org/>. Accessed 8 Mar 2017.
- 433 22. *Seaborn: statistical data visualization.* <http://seaborn.pydata.org/>. Accessed 8 Mar 2017.
- 434 23. de Sousa RV, da Silva Cardoso CR, Butzke G, Dode MAN, Rumpf R, Franco MM. Biopsy  
435 of bovine embryos produced *in vivo* and *in vitro* does not affect pregnancy rates.  
436 *Theriogenology.* 2017;90:25–31.
- 437 24. Faber DC, Ferre LB, Metzger J, Robl JM, Kasinathan P. Review: Agro-economic impact of  
438 cattle cloning. *Cloning Stem Cells.* 2004;6:198–207.
- 439 25. Hasler JF. Forty years of embryo transfer in cattle: a review focusing on the journal  
440 *Theriogenology*, the growth of the industry in North America, and personal reminiscences.  
441 *Theriogenology.* 2014;81:152–69.
- 442 26. Segelke D, Täubert H, Reinhardt F, Thaller G. Considering genetic characteristics in German  
443 Holstein breeding programs. *J Dairy Sci.* 2016;99:458–67.
- 444 27. McClure MC, Bickhart D, Null D, VanRaden P, Xu L, Wiggans G, et al. 2014. Bovine



- 445 exome sequence analysis and targeted SNP genotyping of recessive fertility defects BH1, HH2,  
446 and HH3 reveal a putative causative mutation in *SMC2* for HH3. PLoS One. 2014;9:e92769.
- 447 28. Widmar NJO, Schutz MM, Cole JB. Breeding for polled dairy cows versus dehorning:  
448 preliminary cost assessments and discussion. J Dairy Sci. 2013;96 E-Suppl 1:602.
- 449 29. Spurlock DM, Stock ML, Coetzee JF. The impact of 3 strategies for incorporating polled  
450 genetics into a dairy cattle breeding program on the overall herd genetic merit. J Dairy Sci.  
451 2014;97:5265–74.
- 452 30. Hoeschele I. Potential gain from insertion of major genes into dairy cattle. J Dairy Sci.  
453 1990;73:2601–18.
- 454 31. Schmutz SM, Marquess FLS, Berryere TG, Moker JS. DNA marker-assisted selection of the  
455 polled condition in Charolais cattle. Mamm Genome. 1995;6:710–13.
- 456 32. Dekkers JCM. Commercial application of marker- and gene-assisted selection in livestock:  
457 strategies and lessons. J Anim Sci. 2004;82:E313–28.
- 458 33. Prayaga KC. Genetic options to replace dehorning in beef cattle—a review. Aust J Agric  
459 Res. 2007;58:1–8.
- 460 34. Scheper C, Wensch-Dorendorf M, Yin T, Dressel H, Swalve H, König S. Evaluation of  
461 breeding strategies for polledness in dairy cattle using a newly developed simulation framework  
462 for quantitative and Mendelian traits. Genet Sel Evol. 2;48:50.
- 463 35. Sun C, VanRaden PM. Increasing long-term response by selecting for favorable minor  
464 alleles. PLoS ONE 2014;9:e88510.
- 465 36. Medugorac I, Seichter D, Graf A, Russ I, Blum H, Göpel KH, et al. Bovine polledness – an  
466 autosomal dominant trait with allelic heterogeneity. PLoS One 2012;7:e39477.
- 467 37. Rothhammer S, Capitan A, Mullaart E, Seichter D, Russ I, Medugorac I. The 80-kb DNA

- 468 duplication on BTA1 is the only remaining candidate mutation for the polled phenotype of  
469 Friesian origin. *Genet Sel Evol.* 2014;46:44.
- 470 38. Ledford H. Transgenic salmon leaps to the dinner table. *Nature.* 2015;527:417–8.
- 471 39. Waltz E. Gene-edited CRISPR mushroom escapes US regulation. *Nature.* 2016;532:293.
- 472 40. Maxmen A. Gene-edited animals face US regulatory crackdown. *Nature.* 2017;  
473 doi:10.1038/nature.2017.21331.
- 474 41. Large Animal Genetic Engineering Summit. <http://lage.usu.edu/>. Accessed 10 Mar 2017.
- 475 42. Whitelaw CBA, Sheets TP, Lillico SG, Telugu BP. Engineering large animal models of  
476 human disease. *J Pathol.* 2016;238:247–56.
- 477 43. Carroll D, Van Eenennaam AL, Taylor JF, Seger J, Voytas DF. Regulate genome-edited  
478 products, not genome editing itself. *Nat Biotechnol.* 2016;34:477–9.
- 479 44. Thompson NM, Widmar NO, Schutz MM, Cole JB, Wolf CA. Economic and social  
480 considerations of breeding for polled dairy cows versus dehorning. *J Dairy Sci.* 2017;100:in  
481 press.
- 482 45. Plastow GS. Genomics to benefit livestock production: improving animal health. *Rev Bras*  
483 *Zootec.* 2016;45:349–54.
- 484 46. Burkard C, Lillico SG, Reid E, Jackson B, Mileham, AJ, Ait-Ali T, et al. Precision  
485 engineering for PRRSV resistance in pigs: Macrophages from genome edited pigs lacking  
486 CD163 SRCR5 domain are fully resistant to both PRRSV genotypes while maintaining  
487 biological function. *PLoS Pathogens* 2017;13:e1006206.
- 488 47. Gao Y, Wu H, Wang Y, Liu X, Chen L, Li Q, et al. Single Cas9 nickase induced generation  
489 of *NRAMP1* knockin cattle with reduced off-target effects. *Genome Biol.* 2017;18:13.
- 490 48. Caroli AM, Chessa S, Erhardt GJ. Invited review: Milk protein polymorphisms in cattle:

- 491 Effect on animal breeding and human nutrition. *J Dairy Sci.* 2009;92:5335–5352.
- 492 49. Dikmen S, Alava E, Pontes E, Fear JM, Dikmen BY, Olson TA, et al. Differences in  
493 thermoregulatory ability between slick-haired and wild-type lactating Holstein cows in response  
494 to acute heat stress. *J Dairy Sci.* 2008;91:3395–3402.
- 495 50. Grisart B, Coppieeters W, Farnir F, Karim L, Ford C, Berzi P, et al. Positional candidate  
496 cloning of a QTL in dairy cattle: identification of a missense mutation in the bovine DGAT1  
497 gene with major effect on milk yield and composition. *Genome Res.* 2002;12:222–231.
- 498 51. Tizard M, Hallerman E, Fahrenkrug S, Newell-McGloughlin M, Gibson J, de Loos F, et al.  
499 Strategies to enable the adoption of animal biotechnology to sustainably improve global food  
500 safety and security. *Transgenic Res.* 2016;25:575–95.
- 501 52. Zhang C, Wohlhueter R, Zhang H. Genetically modified foods: a critical review of their  
502 promise and problems. *Food Sci. Hum. Wellness* 2016;5:116–23.
- 503 53. Hess S, Lagerkvist CJ, Redekop W, Pakseresht A. Consumers' evaluation of  
504 biotechnologically modified food products: new evidence from a meta-survey. *Eur Rev Agric  
505 Econ.* 2016;43:703–36.
- 506 54. Mather D, Vikan R, Knight J. Marketplace response to GM animal products. *Nat.  
507 Biotechnol.* 2016;34:236–8.
- 508 55. Ishii T, Araki M. Consumer acceptance of food crops developed by genome editing. *Plant  
509 Cell Rep.* 2016;35:1507–18. doi:10.1007/s00299-016-1974-2.
- 510 56. Ragan-Kelley M, Perez F, Granger B, Kluyver T, Ivanov P, Frederic J, et al. 2014. The  
511 Jupyter/IPython architecture: a unified view of computational research, from interactive  
512 exploration to communication and publication. Abstr H44D-07 presented at 2014 Fall Meeting,  
513 AGU, San Francisco, CA, 15–19 Dec. <http://abstractsearch.agu.org/meetings/2014/FM/H44D->

514 07.html. Accessed 10 Mar 2017.

## Figures

### **Figure 1 Flowchart for gene editing and embryo transfer in the simulation**

### **Figure 2 Schematic of simulated scenarios**

Terms are nested within one another from left to right (e.g., the proportion of bulls edited is nested within the recessive scenario). *CRISPR* clustered regularly interspaced short palindromic repeats, *TALEN* transcription activator-like effector nuclease, *Perfect* = hypothetical technology with a perfect success rate, *ZFN* zinc finger nuclease

### **Figure 3 Observed minor allele frequency of the Holstein recessive locus HH3 for five different gene-editing technologies over 20 years**

**a** Top 1% of bulls and 0% of cows were edited. **b** Top 10% of bulls and top 1% of cows were edited. *CRISPR* clustered regularly interspaced short palindromic repeats, *TALEN* transcription activator-like effector nuclease, *Perfect* = hypothetical technology with a perfect success rate, *ZFN* zinc finger nuclease

### **Figure 4 Observed versus expected changes in allele frequencies of the Holstein recessive locus HH3 for five different gene-editing technologies over 20 years**

**a** Top 1% of bulls and 0% of cows were edited. **b** Top 10% of bulls and top 1% of cows were edited. *CRISPR* clustered regularly interspaced short palindromic repeats, *TALEN* transcription activator-like effector nuclease, *Perfect* = hypothetical technology with a perfect success rate, *ZFN* zinc finger nuclease

### **Figure 5 Average inbreeding rate in a simulation of 12 Holstein recessive loci for five different gene-editing technologies over 20 years**

**a** Top 1% of bulls and 0% of cows were edited. **b** Top 10% of bulls and top 1% of cows were edited. *CRISPR* clustered regularly interspaced short palindromic repeats, *TALEN* transcription activator-like effector nuclease, *Perfect* = hypothetical technology with a perfect success rate, *ZFN* zinc finger nuclease

### **Figure 6 Observed minor allele frequency of the Holstein recessive locus horned for five different gene-editing technologies over 20 years**

**a** Top 1% of bulls and 0% of cows were edited. **b** Top 10% of bulls and top 1% of cows were edited. *CRISPR* clustered regularly interspaced short palindromic repeats, *TALEN* transcription activator-like effector nuclease, *Perfect* = hypothetical technology with a perfect success rate, *ZFN* zinc finger nuclease

**Figure 7 Observed versus expected changes in allele frequencies of the Holstein recessive locus horned for five different gene-editing technologies over 20 years**

**a** Top 1% of bulls and 0% of cows were edited. **b** Top 10% of bulls and top 1% of cows were edited. *CRISPR* clustered regularly interspaced short palindromic repeats, *TALEN* transcription activator-like effector nuclease, *Perfect* = hypothetical technology with a perfect success rate, *ZFN* zinc finger nuclease

**Figure 8 Proportion of embryos that died each year because of the effects of recessive genotypes for five different gene-editing technologies over 20 years**

**a** Top 1% of bulls and 0% of cows were edited. **b** Top 10% of bulls and top 1% of cows were edited. *CRISPR* clustered regularly interspaced short palindromic repeats, *TALEN* transcription activator-like effector nuclease, *Perfect* = hypothetical technology with a perfect success rate, *ZFN* zinc finger nuclease

**Figure 9 Proportions of genotyped Holsteins that have known recessives by animal sex**

Bulls and cows were born from 2000 through 2015. Carrier status was either not a carrier of a known recessive or a carrier of one known recessive or more.

**Figure 1** Flowchart for gene editing and embryo transfer in the simulation

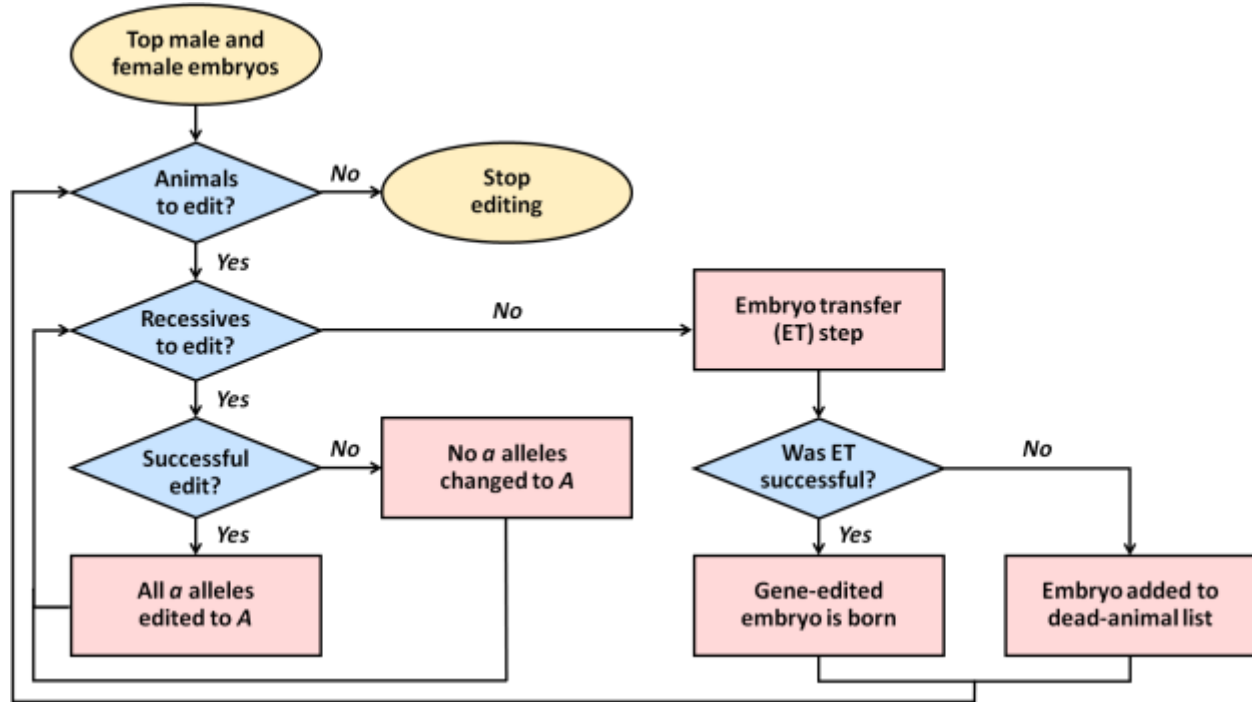

## Figure 2 Schematic of simulated scenarios

Terms are nested within one another from left to right (e.g., the proportion of bulls edited is nested within the recessive scenario). *CRISPR* clustered regularly interspaced short palindromic repeats, *TALEN* transcription activator-like effector nuclease, *Perfect* = hypothetical technology with a perfect success rate, *ZFN* zinc finger nuclease

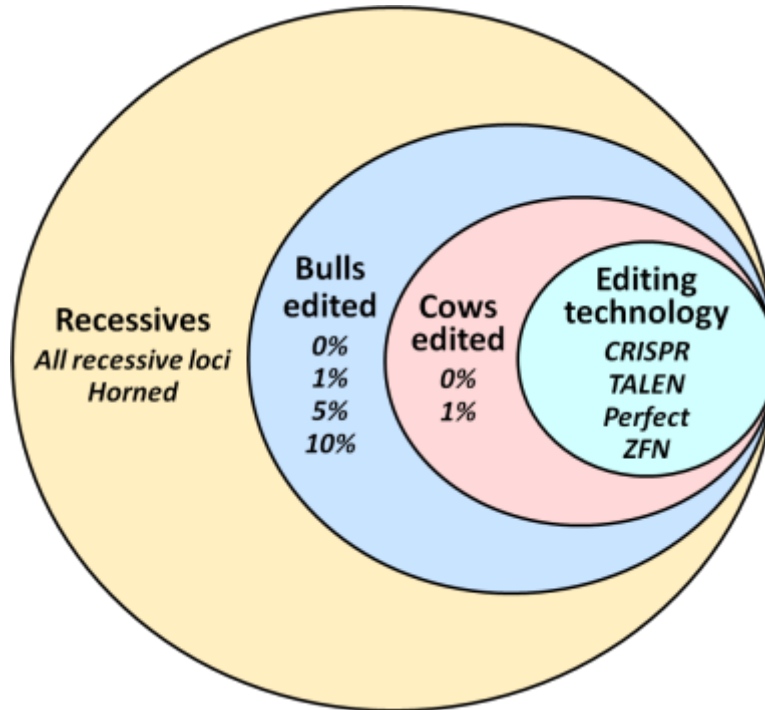



### Figure 3 Observed minor allele frequency of Holstein recessive locus HH3 for five different gene-editing technologies over 20 years

**a** Top 1% of bulls and 0% of cows were edited. **b** Top 10% of bulls and top 1% of cows were edited. *CRISPR* clustered regularly interspaced short palindromic repeats, *TALEN* transcription activator-like effector nuclease, *Perfect* = hypothetical technology with a perfect success rate, *ZFN* zinc finger nuclease

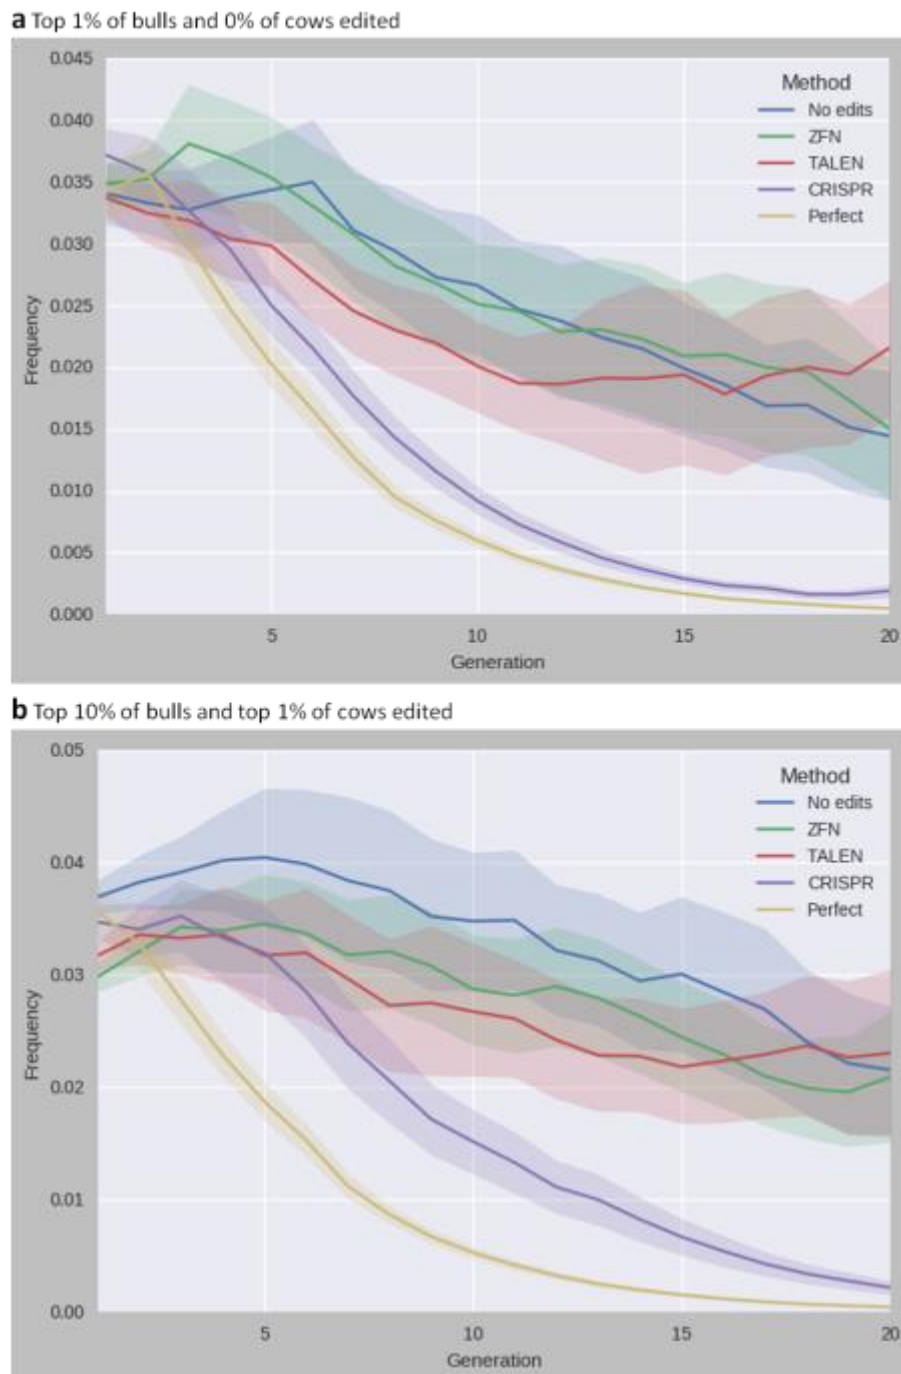

## Figure 4 Observed versus expected changes in allele frequencies of Holstein recessive locus HH3 for five different gene-editing technologies over 20 years

**a** Top 1% of bulls and 0% of cows were edited. **b** Top 10% of bulls and top 1% of cows were edited. *CRISPR* clustered regularly interspaced short palindromic repeats, *TALEN* transcription activator-like effector nuclease, *Perfect* = hypothetical technology with a perfect success rate, *ZFN* zinc finger nuclease

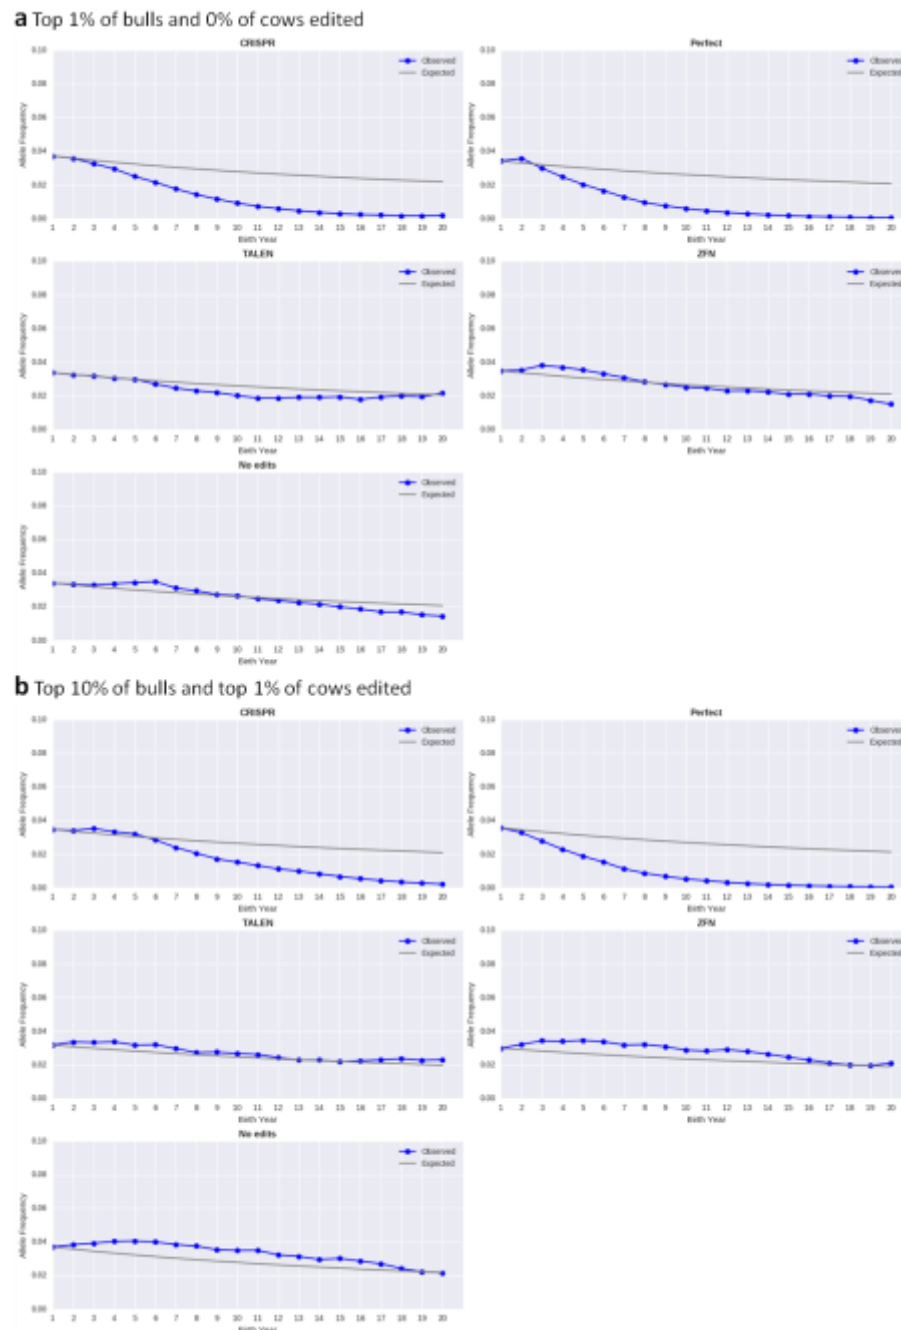

### Figure 5 Average inbreeding rate in a simulation of 12 Holstein recessive loci for five different gene-editing technologies over 20 years

**a** Top 1% of bulls and 0% of cows were edited. **b** Top 10% of bulls and top 1% of cows were edited. *CRISPR* clustered regularly interspaced short palindromic repeats, *TALEN* transcription activator-like effector nuclease, *Perfect* = hypothetical technology with a perfect success rate, *ZFN* zinc finger nuclease

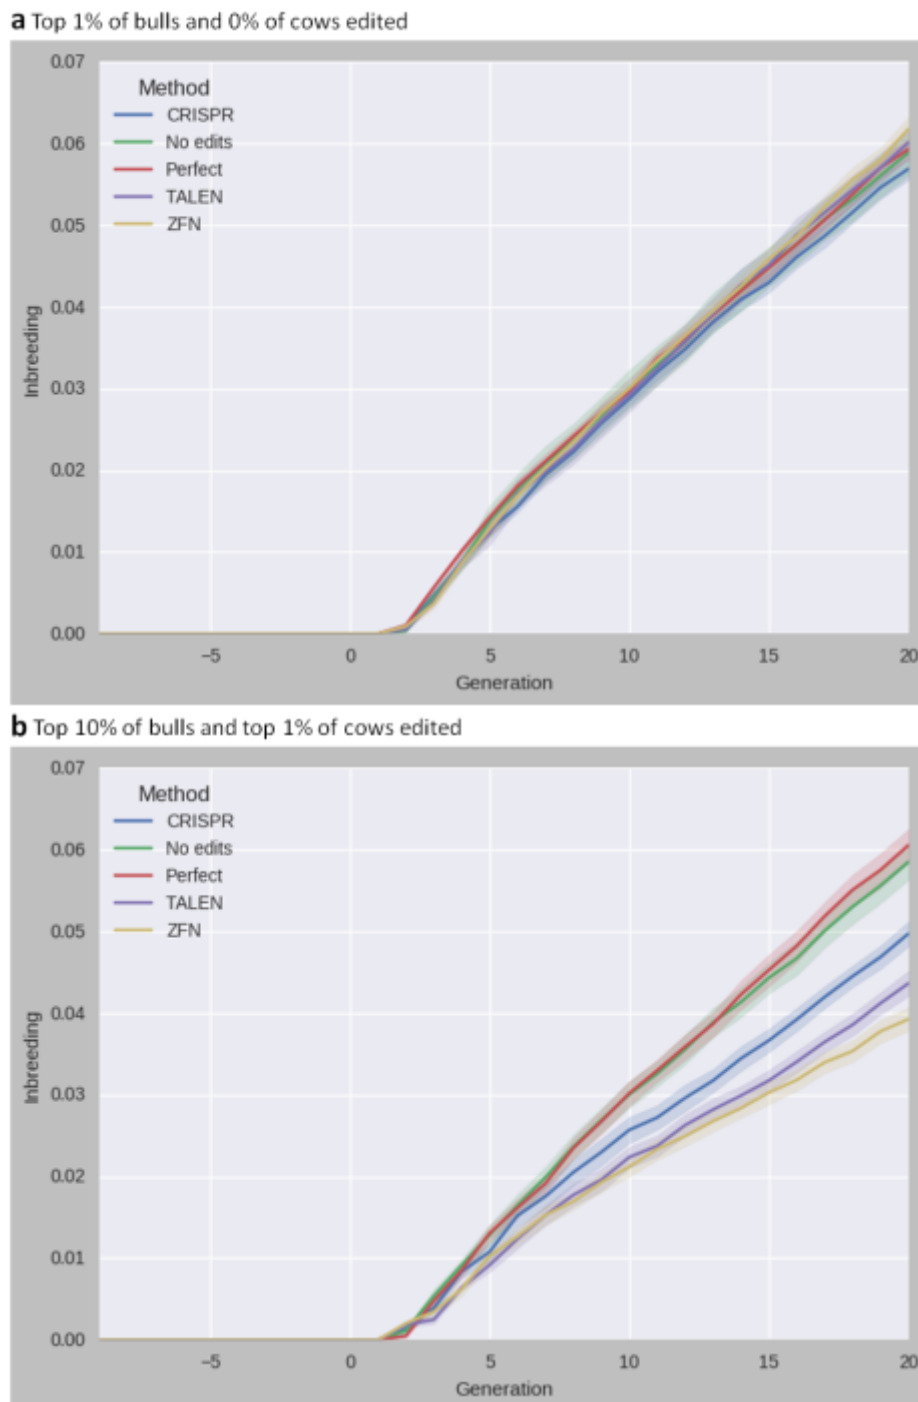

### Figure 6 Observed minor allele frequency of the Holstein recessive locus horned for five different gene-editing technologies over 20 years

**a** Top 1% of bulls and 0% of cows were edited. **b** Top 10% of bulls and top 1% of cows were edited. *CRISPR* clustered regularly interspaced short palindromic repeats, *TALEN* transcription activator-like effector nuclease, *Perfect* = hypothetical technology with a perfect success rate, *ZFN* zinc finger nuclease

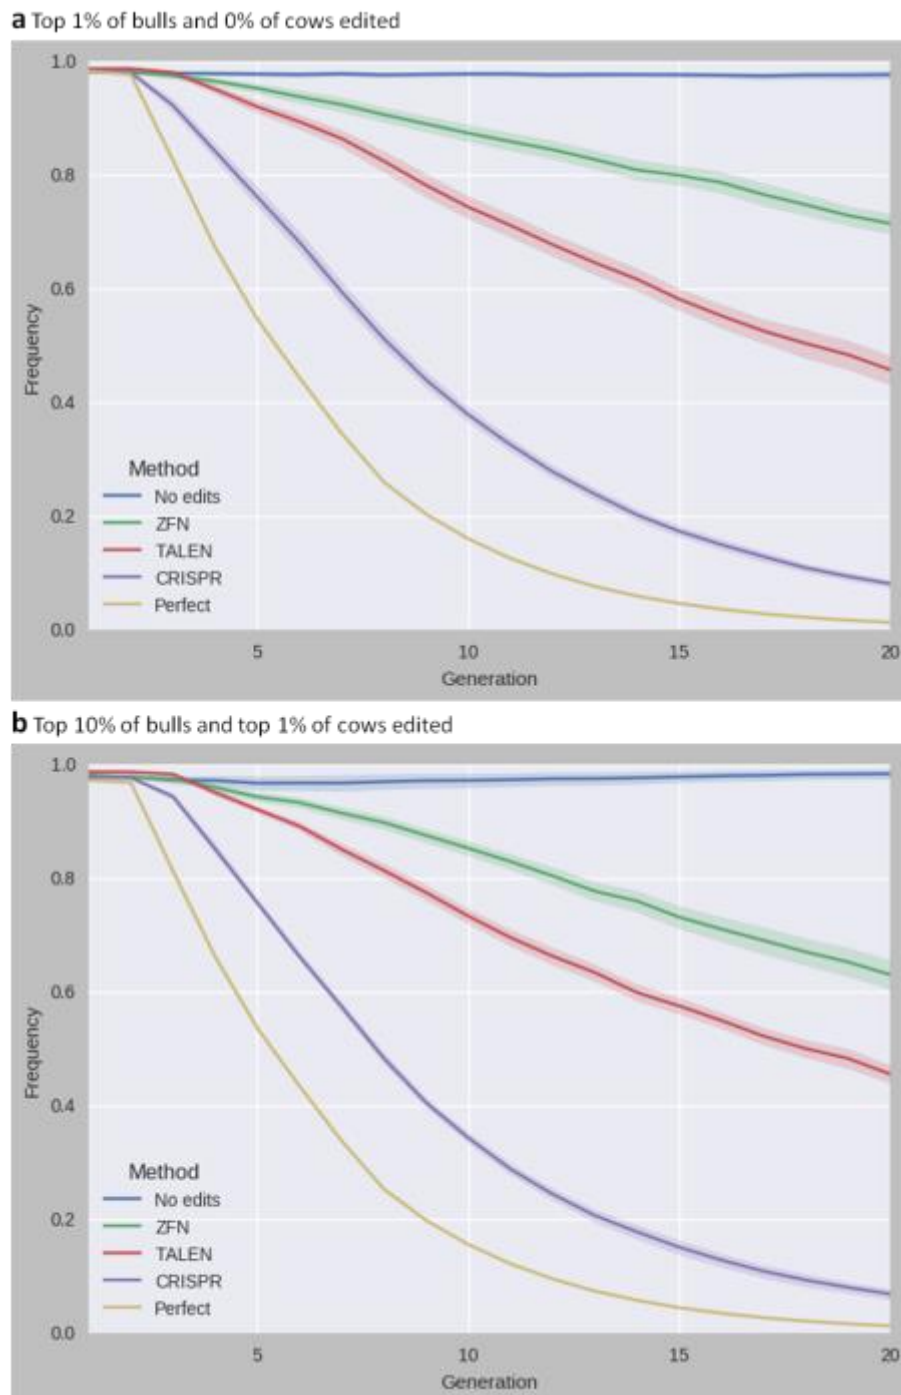

## Figure 7 Observed versus expected changes in allele frequencies of the Holstein recessive locus horned for five different gene-editing technologies over 20 years

**a** Top 1% of bulls and 0% of cows were edited. **b** Top 10% of bulls and top 1% of cows were edited. *CRISPR* clustered regularly interspaced short palindromic repeats, *TALEN* transcription activator-like effector nuclease, *Perfect* = hypothetical technology with a perfect success rate, *ZFN* zinc finger nuclease

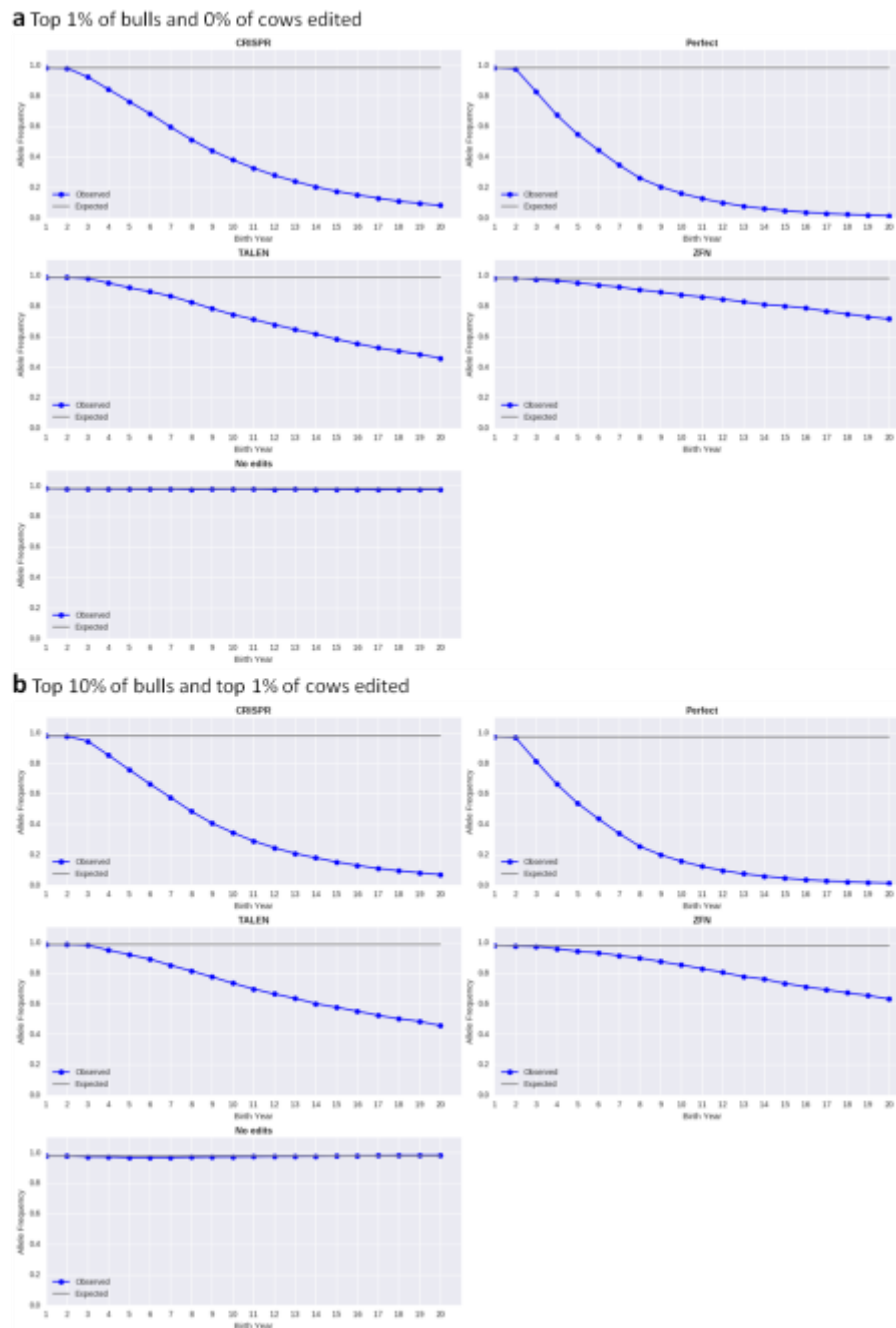

### Figure 8 Proportion of embryos that died each year because of the effects of recessive genotypes for five different gene-editing technologies over 20 years

**a** Top 1% of bulls and 0% of cows were edited. **b** Top 10% of bulls and top 1% of cows were edited. *CRISPR* clustered regularly interspaced short palindromic repeats, *TALEN* transcription activator-like effector nuclease, *Perfect* = hypothetical technology with a perfect success rate, *ZFN* zinc finger nuclease

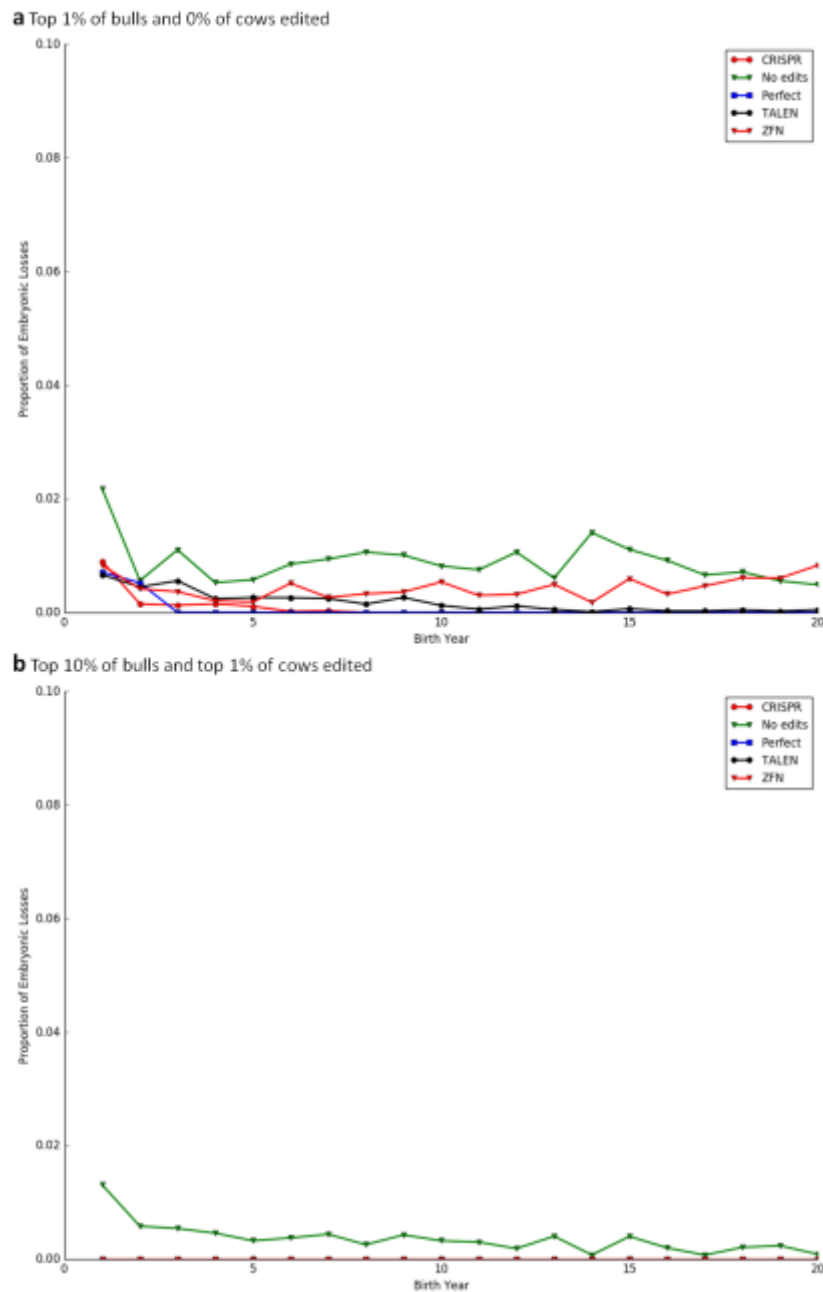

### Figure 9 Proportions of genotyped Holsteins that have known recessives by birth year

Bulls and cows were born from 2000 through 2015. Carrier status was either not a carrier of a known recessive or a carrier of one known recessive or more.

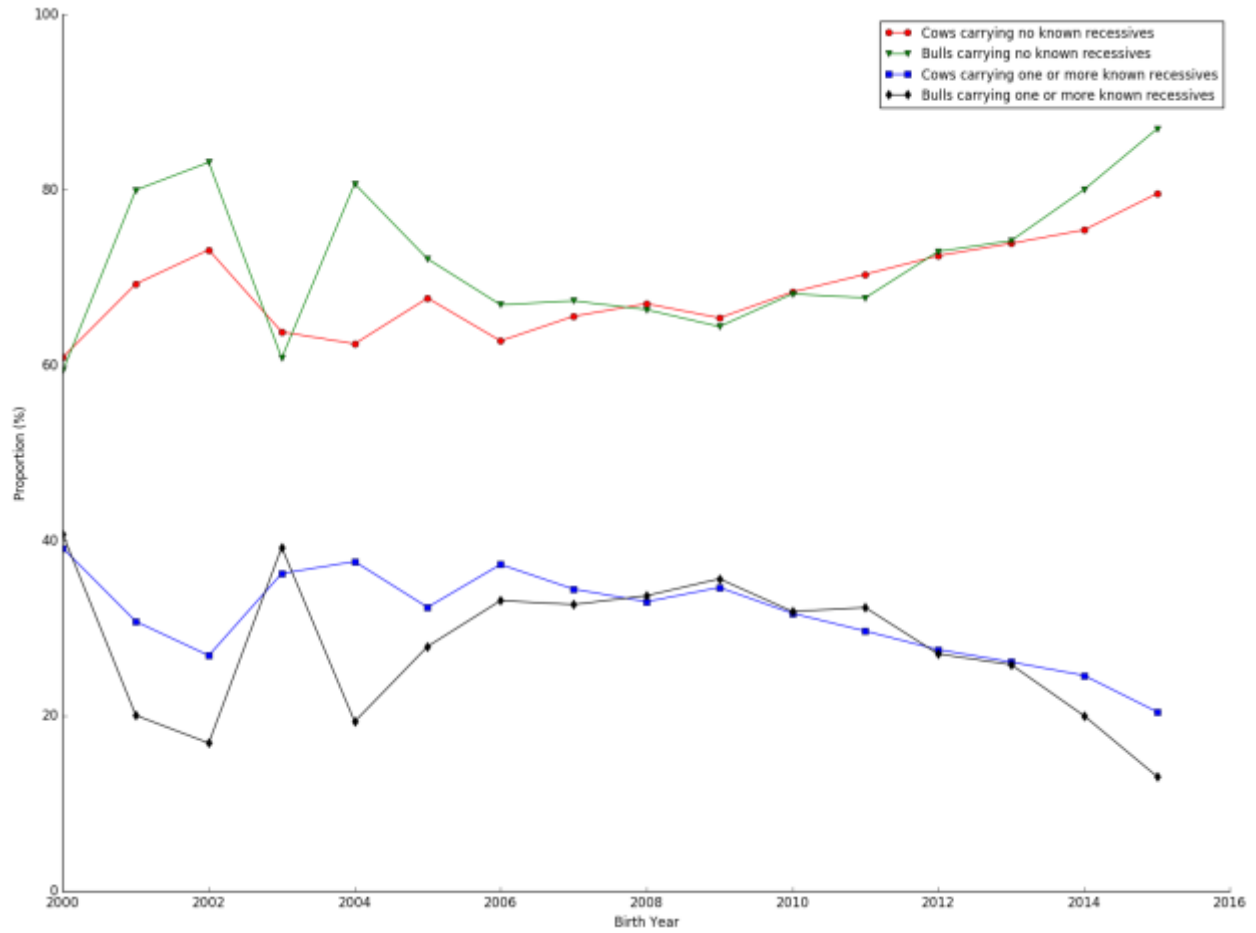

Source: https://www.biorxiv.org/content/10.1101/116459v1.full.pdf
